# Supplementary material for: Boosting fast and stable sodium-ion storage in TiO2 by amorphization engineering and superstructure design
Source: Royal Society of Chemistry journal article supplement (doi:10.1039/d5cc01843a), 2025-01-01
Supplement: d5cc01843a1.pdf [file d5cc01843a1.pdf]

## Supplementary Information for

### **Boosting Fast and Stable Sodium-Ion Storage in TiO<sub>2</sub> by Amorphization Engineering and Superstructure Design**

Xuanyu Lyu,<sup>a</sup> Ziyue Zheng,<sup>b</sup> Jiaoying Xie,<sup>a</sup> Jing Yang,<sup>b</sup> Dong Yang,<sup>a</sup> Yajun Wang,<sup>\*c</sup>  
Tongtao Li,<sup>\*b</sup> and Angang Dong<sup>\*b</sup>

*<sup>a</sup>State Key Laboratory of Molecular Engineering of Polymers and Department of Macromolecular Science, Fudan University, Shanghai 200433, China.*

*<sup>b</sup>State Key Laboratory of Porous Materials for Separation and Conversion and Department of Chemistry, Shanghai Key Laboratory of Molecular Catalysis and Innovative Materials, and iChEM, Fudan University, Shanghai 200433, China.*

*<sup>c</sup>College of Chemistry and Materials Engineering, Wenzhou University, Wenzhou 325027, China.*

## Experimental Section

### Materials

Oleic acid (OA), oleylamine (OAm), tris(hydroxymethyl)aminomethane, and dopamine hydrochloride were purchased from Aladdin. Hydrofluoric acid (HF) and hydrochloric acid (HCl) were purchased from Sinopharm Chemical Reagent Co. Ltd (China).  $\text{Ti}_2\text{AlC}$  powders were purchased from 11Technology Co., Ltd., Jilin, China. CNT powders were purchased from Qingdao Haoxin Co., Ltd.  $\text{Na}_3\text{V}_2(\text{PO}_4)_3$  powders were purchased from Duoduochem Co., Ltd Suzhou, China.

### Preparation of am- $\text{TiO}_2$ NSs:

The am- $\text{TiO}_2$  NSs were synthesized via a topochemical transformation process of  $\text{Ti}_2\text{CT}_x$  MXene nanosheets in a nonpolar solvent.<sup>1</sup> Initially, pristine  $\text{Ti}_2\text{CT}_x$  NSs were synthesized through selective etching of  $\text{Ti}_2\text{AlC}$  powders (0.5 g) in 20 mL aqueous mixture of HF (2 mL, 40 wt%) and HCl (12 mL, 12M) followed by a liquid-exfoliation process.<sup>2</sup> Subsequently, the resulting monolayer  $\text{Ti}_2\text{CT}_x$  NSs were functionalized with OAm and OA ligands and underwent natural oxidation in a  $\text{CHCl}_3$  solution. The resulting am- $\text{TiO}_2$  NSs were purified through ethanol washing to remove residual ligands and then redispersed in  $\text{CHCl}_3$  at a concentration of 60 mg/mL for subsequent use.

### Surface-modification of CNTs:

The surface modification of CNTs involves a two-step procedure. Initially, pristine CNTs underwent functionalization with poly(dopamine) to introduce additional functional groups onto the surface. Subsequently, the pre-treated CNTs were further functionalized with OAm and OA ligands. In a typical process, 200 mg of CNTs were dispersed in a solution comprising ethanol (100 mL) and water (80 mL) through sonication for 1 h. Subsequently, 400 mg of dopamine was introduced into the solution, followed by the addition of 200 mL of an aqueous TRIS solution (600 mg). The resultant mixture was stirred for 24 h at room temperature. The resulting product (donated as CNT-PDA) was collected by filtration, washed with ethanol and water, and subsequently dried in a vacuum oven at 80 °C for 12 h.<sup>3</sup>

In the second step, the obtained CNT-PDA powders (200 mg) were added to a mixed solution consisting of 50 mL of  $\text{CHCl}_3$ , 5 mL of OAm, and 5 mL of OA under sonication for 2 h. The ligand-modified CNTs (CNT-OAm,OA) were subjected to ethanol washing for purification, and then redispersed in  $\text{CHCl}_3$  at a concentration of 10 mg/mL.

#### **Fabrication of am-TiO<sub>2</sub>-CNT, c-TiO<sub>2</sub>, and ca-TiO<sub>2</sub>-CNT.**

The co-assembly of am-TiO<sub>2</sub> NSs and ligand-modified CNTs was induced through a solvent evaporation process. Briefly, a  $\text{CHCl}_3$  solution containing am-TiO<sub>2</sub> nanosheets and as-prepared ligand-grafted CNTs, with a mass ratio of 5:1, was allowed to evaporate under ambient conditions within a container. The complete solvent evaporation leads to the formation of lamellar superstructures in which CNTs are intercalated into the interlayers of stacked am-TiO<sub>2</sub> NSs. To carbonize the ligands, the as-assembled superstructures were subjected to thermal treatment at 500°C under an argon atmosphere for 2 h, resulting in the formation of am-TiO<sub>2</sub>-CNT. The content of am-TiO<sub>2</sub> NSs in am-TiO<sub>2</sub>-CNT was 65-75 wt%, depending on the ratio of the two components used for co-assembly.

The synthesis of c-TiO<sub>2</sub> NPs followed a similar procedure, albeit without the addition of ligand-grafted CNTs during self-assembly. The ca-TiO<sub>2</sub>-CNT and c-TiO<sub>2</sub>-CNT were obtained by mixing the commercial TiO<sub>2</sub> powders and c-TiO<sub>2</sub> NPs with CNT powders with a mass ratio of 5:1.

#### **Materials characterization**

Transmission electron microscopy (TEM) images, high-resolution TEM (HRTEM) images, high-angle annular dark-field scanning TEM (HAADF-STEM) images, and energy dispersive X-ray spectroscopy (EDS) were carried out on a Tecnai G2 F20 S-Twin microscope operated at 200 kV. Scanning electron microscopy (SEM) images were obtained using a Zeiss Ultra-55 microscope operated at 3 kV. The electrical conductivities were characterized by a four-point probe instrument (SB118, Shanghai Qianfeng Electronic Instrument Co., Ltd, China). X-ray diffraction (XRD) measurements were carried out on a Bruker D4 Xray diffractometer. Raman spectra

were obtained at room temperature on a XploRA Raman system. Fourier-transform infrared (FTIR) spectra were collected by a PerkinElmer Spectrum Two spectrometer. X-ray photoelectron spectroscopy (XPS) was conducted on a Perkin Elmer PHI-5000C ECSA system. N<sub>2</sub> adsorption-desorption isotherms were collected by a Quadrasorb evo H1101416. The contact angle measurements with the electrolytes were carried out on a DSA-25 drop shape analyzer at room temperature.

### **Electrochemical Measurements**

CR2016-type coin cells were assembled in a glove box with H<sub>2</sub>O and O<sub>2</sub> levels maintained below 0.1 ppm to evaluate the electrochemical performances of TiO<sub>2</sub>-based materials. The working electrodes comprised as-synthesized active materials, Super P, and polyvinylidene difluoride (PVDF) in a mass ratio of 8:1:1, with an average mass loading of ~1.0 mg/cm<sup>2</sup>. Sodium disks served as the counter electrodes, while glass fiber films were used as separators. The electrolyte for sodium-ion batteries (SIBs) consisted of 1 M NaPF<sub>6</sub> in pure diglyme. Cyclic voltammetry (CV) and electrochemical impedance spectroscopy (EIS) were conducted using a CHI660D electrochemical workstation. Galvanostatic measurements and galvanostatic intermittent titration technique (GITT) measurements were carried out on a Land CT2001A cell test system.

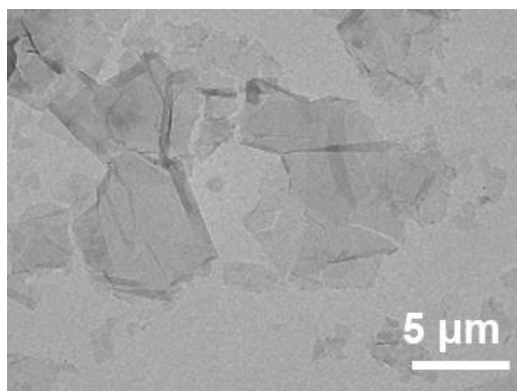

**Fig. S1.** Typical TEM image of colloidal am-TiO<sub>2</sub> NSs.

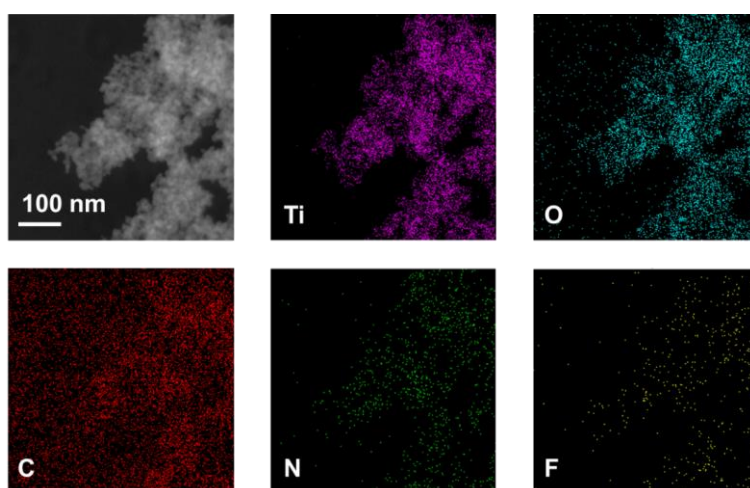

**Fig. S2.** STEM image and corresponding elemental mappings of c-TiO<sub>2</sub> NPs.

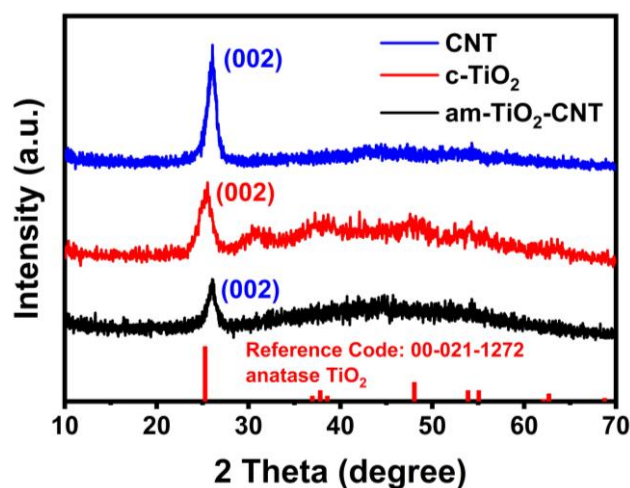

**Fig. S3.** XRD patterns of c-TiO<sub>2</sub> NPs, am-TiO<sub>2</sub>-CNT, and CNT powders, respectively. The (002) peak in the XRD pattern of am-TiO<sub>2</sub>-CNT originated from CNTs, while the absence of the anatase TiO<sub>2</sub> peaks suggested the amorphous nature of TiO<sub>2</sub> in am-TiO<sub>2</sub>-CNT.

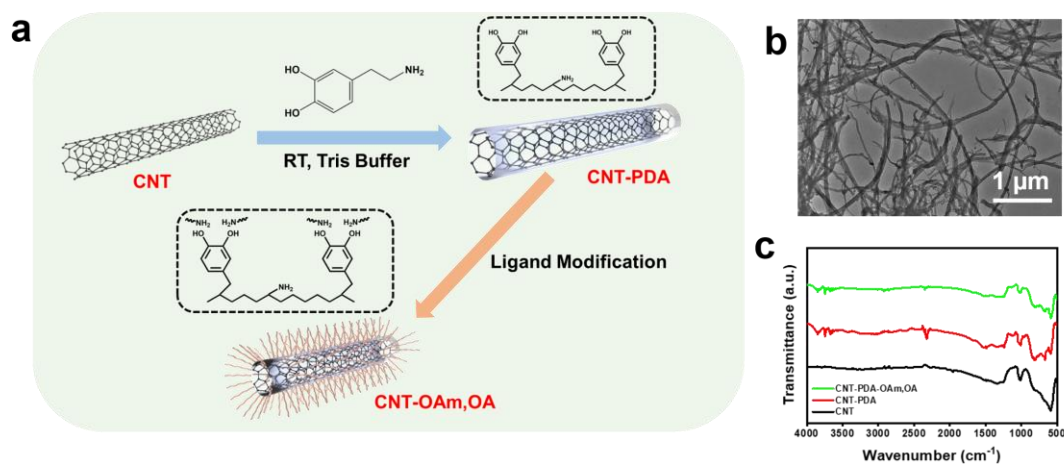

**Fig. S4.** (a). Schematic illustration of surface modification of CNTs. (b). TEM image of pristine CNTs. (c) FTIR spectra of CNTs, CNT-PDA and CNT-OAm,OA.

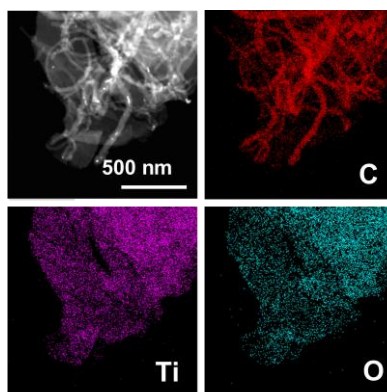

**Fig. S5.** STEM image and corresponding elemental mappings of am-TiO<sub>2</sub>-CNT.

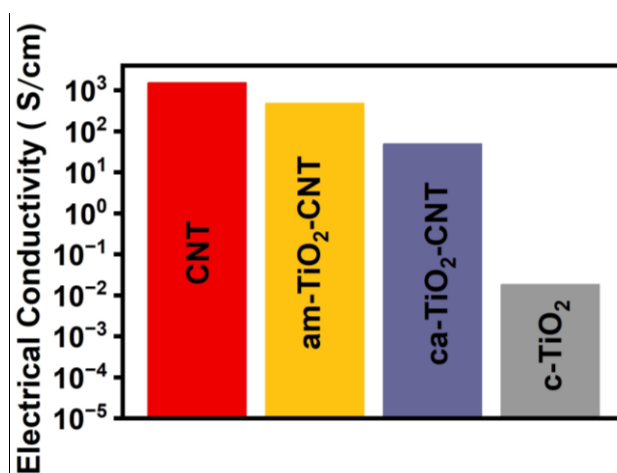

**Fig. S6.** Electrical conductivity of pristine CNTs, am-TiO<sub>2</sub>-CNT, ca-TiO<sub>2</sub>-CNT, and c-TiO<sub>2</sub> NPs. The CNT content in am-TiO<sub>2</sub>-CNT and ca-TiO<sub>2</sub>-CNT was the same.

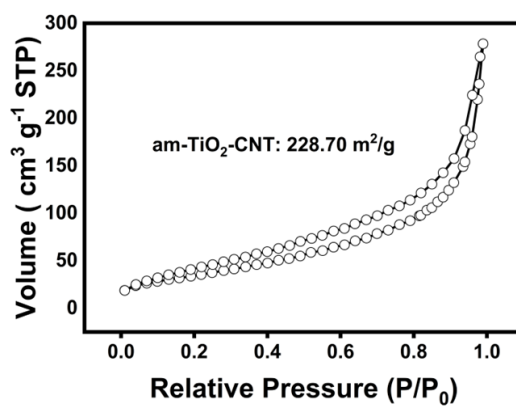

**Fig. S7.** N<sub>2</sub> adsorption-desorption isotherm of am-TiO<sub>2</sub>-CNT.

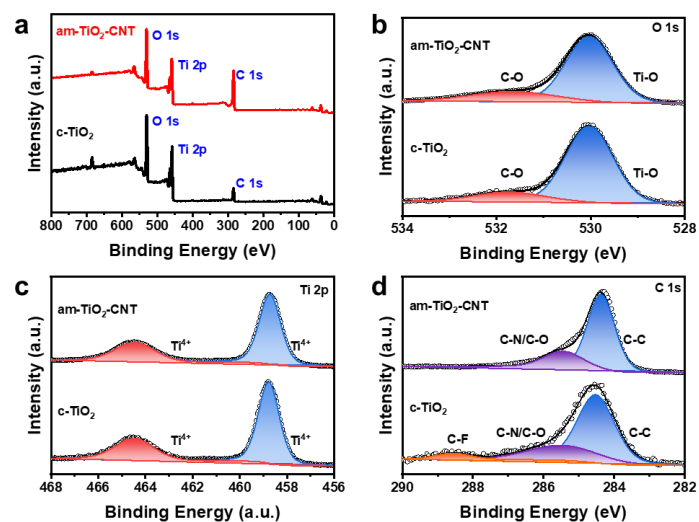

**Fig. S8.** (a) XPS survey spectra of c-TiO<sub>2</sub> NPs and am-TiO<sub>2</sub>-CNT. High-resolution XPS spectra of c-TiO<sub>2</sub> and am-TiO<sub>2</sub>-CNT: (b) O 1s, (c) Ti 2p, and (d) C 1s.

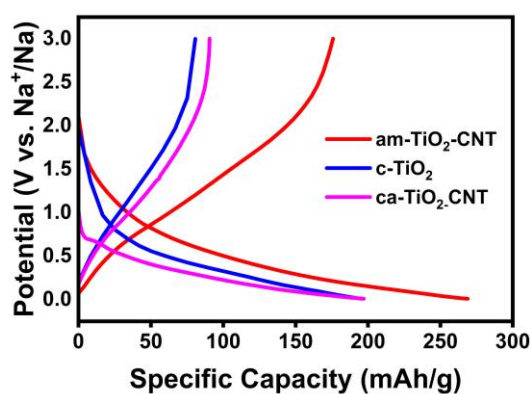

**Fig. S9.** GCD curves of various TiO<sub>2</sub>-based electrodes at 500 mA/g.

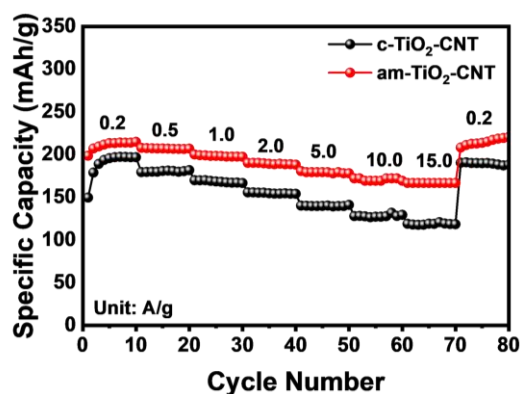

**Fig. S10.** Rate performances of am-TiO<sub>2</sub>-CNT and c-TiO<sub>2</sub>-CNT electrodes.



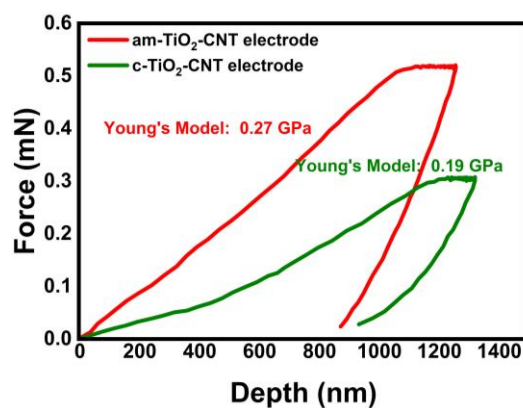

**Fig. S11.** Load-displacement curves of the am-TiO<sub>2</sub>-CNT and c-TiO<sub>2</sub>-CNT electrodes, respectively.

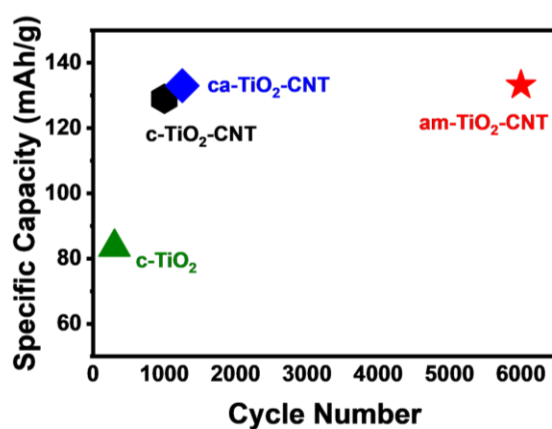

**Fig. S12.** Comparison of the cycling performances of am-TiO<sub>2</sub>-CNT, ca-TiO<sub>2</sub>-CNT, c-TiO<sub>2</sub>, and c-TiO<sub>2</sub>-CNT at 10 A/g.

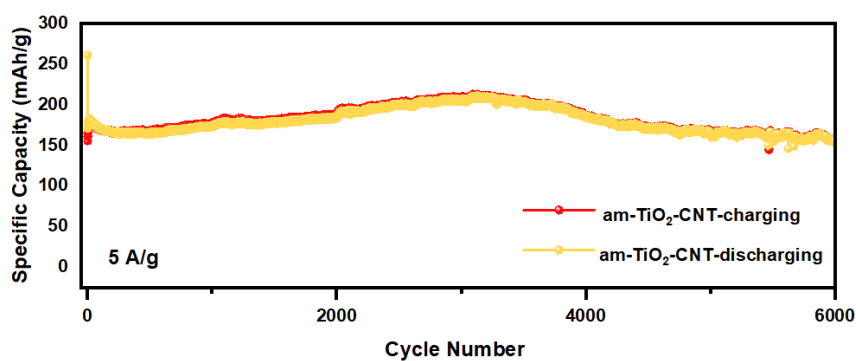

**Fig. S13.** Long-term cycling performance of the am-TiO<sub>2</sub>-CNT electrode at the current rate of 5 A/g.

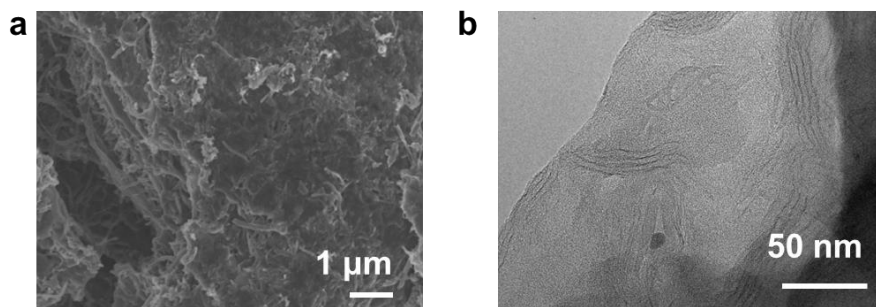

**Fig. S14.** (a) SEM and (b) TEM images of am-TiO<sub>2</sub>-CNT electrodes after 6000 cycles at 10 A/g.

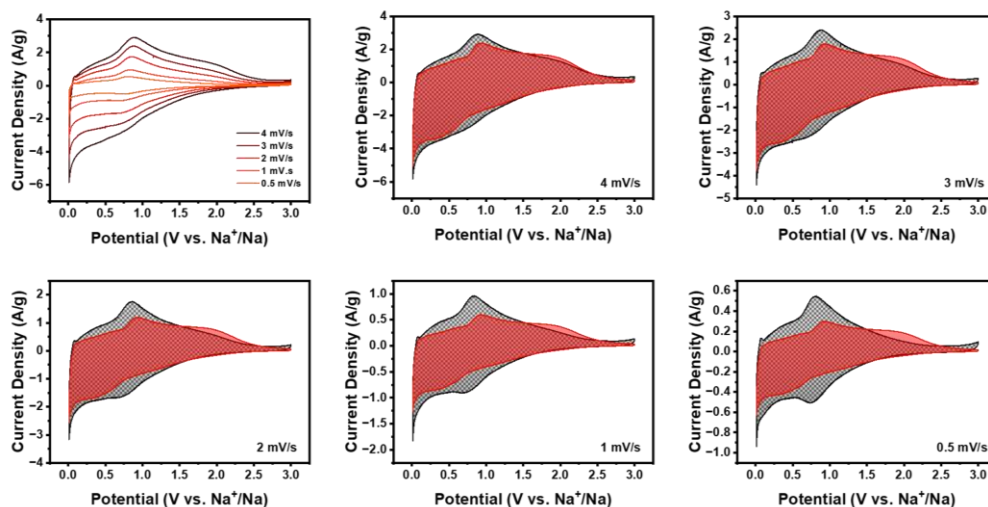

**Fig. S15.** CV curves of the am-TiO<sub>2</sub>-CNT electrode at different scan rates and the contribution of the capacity.

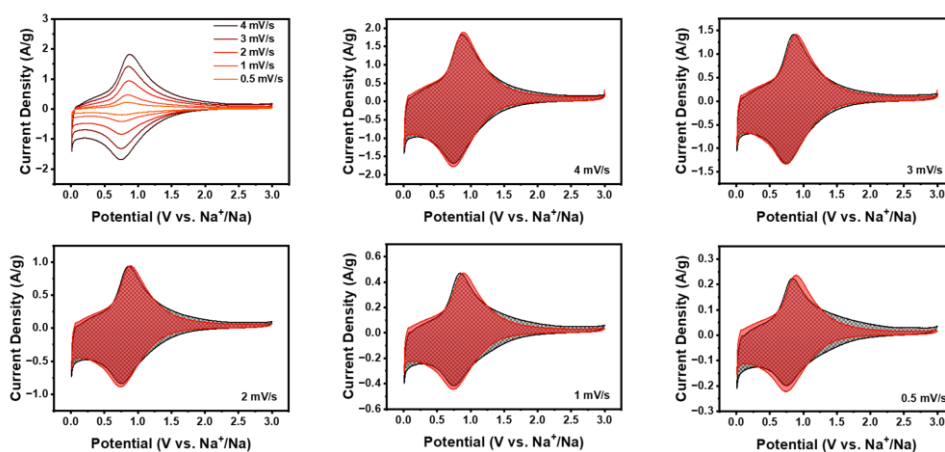

**Fig. S16.** CV curves of the c-TiO<sub>2</sub> electrode at different scan rates and the contribution of the capacity.

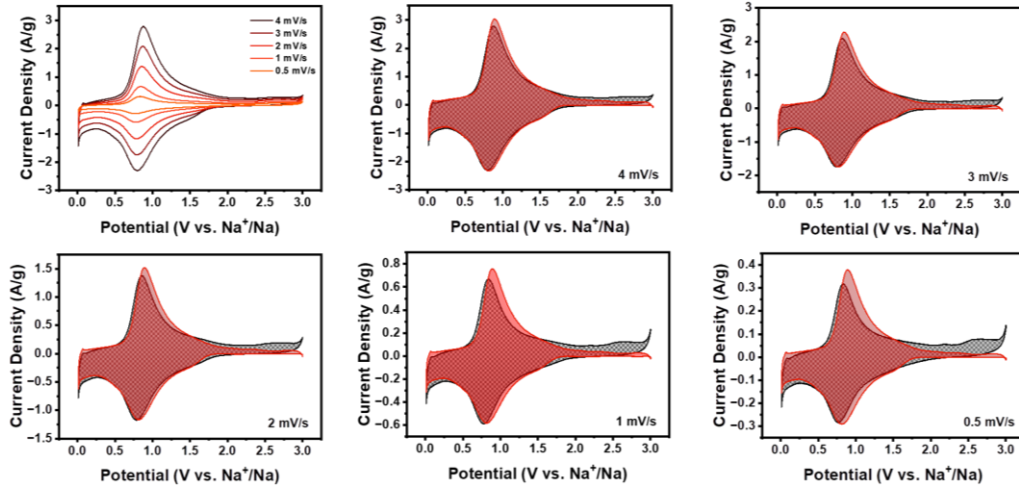

**Fig. S17.** CV curves of the ca-TiO<sub>2</sub>-CNT electrode at different scan rates and the contribution of the capacity.

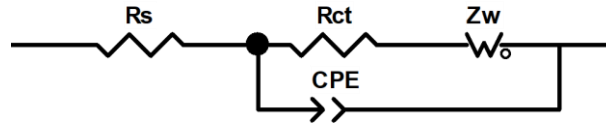

**Fig. S18.** Equivalent circuit of am-TiO<sub>2</sub>-CNT, c-TiO<sub>2</sub>, and ca-TiO<sub>2</sub>-CNT in SIBs

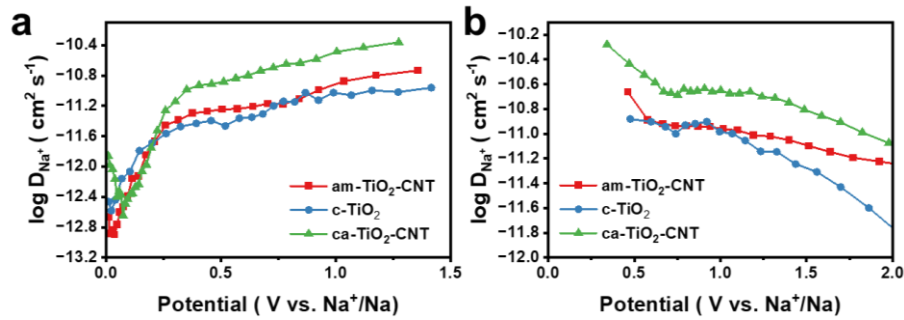

**Fig. S19.** Calculated sodium-ion diffusion coefficients ( $D_{Na^+}$ ) in the (a) discharging and (b) charging processes for am-TiO<sub>2</sub>-CNT, ca-TiO<sub>2</sub>-CNT, and c-TiO<sub>2</sub> electrodes based on the GITT measurements.

GITT measurements corroborated the lower  $D_{Na^+}$  of am-TiO<sub>2</sub>-CNT compared to ca-TiO<sub>2</sub>-CNT. This discrepancy stems from fundamentally different sodium storage behaviors between crystalline and amorphous structures. For crystalline TiO<sub>2</sub>, sodium storage is primarily confined to surface layers (3-5 nm in depth), artificially inflating the value since only surface reactions contribute. In contrast, Na<sup>+</sup> storage occurs throughout the bulk of am-TiO<sub>2</sub> NSs due to their atomically disordered structure. While this leads to longer diffusion pathways (and thus numerically lower  $D_{Na^+}$ ), it reflects full active-material utilization rather than surface-limited kinetics.

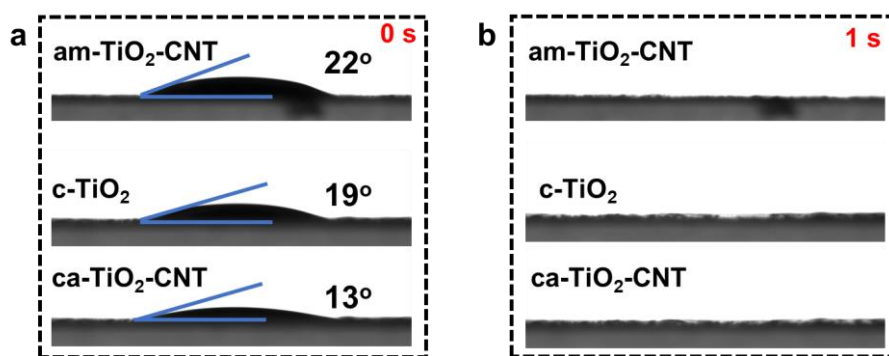

**Fig. S20.** The contact-test of the am-TiO<sub>2</sub>-CNT, c-TiO<sub>2</sub> and ca-TiO<sub>2</sub>-CNT electrodes at different time intervals: (a) 0 s; (b) 1 s.

In the case of c-TiO<sub>2</sub> NPs and ca-TiO<sub>2</sub>-CNT electrodes, the random stacking of NPs generates numerous cracks within the electrodes, enhancing electrolyte penetration. In contrast, the lamellar arrangement of am-TiO<sub>2</sub> NSs, combined with their large surface area, hinders the complete wetting of electrodes. Nonetheless, the highly-accessible superstructure allowed am-TiO<sub>2</sub>-CNT to achieve rapid electrolyte permeation (<1 s), thereby minimizing its impact on overall electrochemical performance.

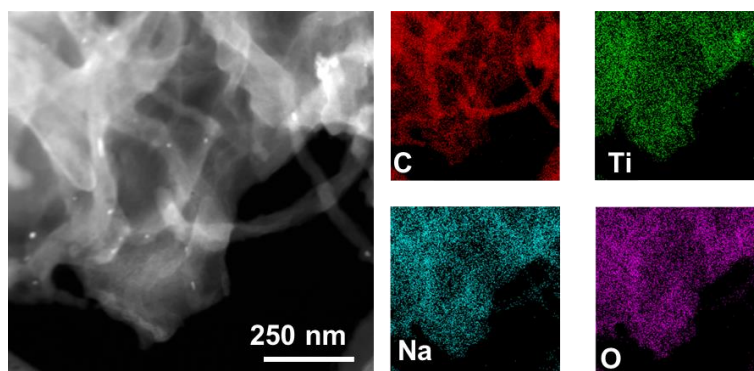

**Fig. S21.** STEM image and corresponding elemental mappings of the am-TiO<sub>2</sub>-CNT electrode after the sodiation process, showing the uniform distribution of Na across the NSs.

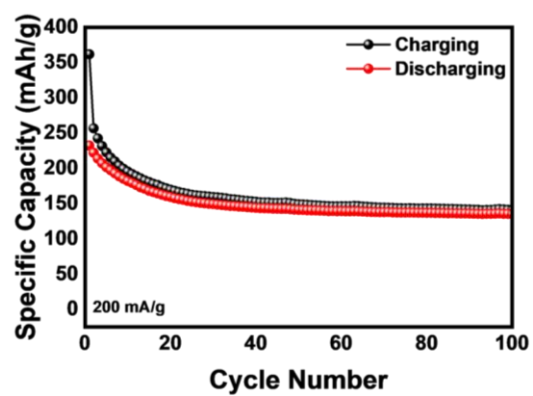

**Fig. S22.** Cycling performances of full-cells of  $\text{Na}_3\text{V}_2(\text{PO}_4)_3/\text{am-TiO}_2\text{-CNT}$  at 200 mA/g.

**Table 1** Rate performance comparison between am-TiO<sub>2</sub>-CNT and reported TiO<sub>2</sub>-based anode materials for SIBs.

| Electrode materials                                   | Current density (A/g) | Specific capacity (mAh/g) | Ref.             |
|-------------------------------------------------------|-----------------------|---------------------------|------------------|
| NF-TiO <sub>2</sub>                                   | 10.05                 | 157.8                     | [4]              |
|                                                       | 16.75                 | 148.7                     |                  |
| TiO <sub>2-x</sub> tube                               | 2.00                  | 172.8                     | [5]              |
|                                                       | 5.00                  | 153.8                     |                  |
|                                                       | 10.00                 | 134.6                     |                  |
| TiC <sub>x</sub> N <sub>1-x</sub> /N-TiO <sub>2</sub> | 3.35                  | 173.7                     | [6]              |
| CON-TiO <sub>2</sub> -HS                              | 3.00                  | 168.9                     | [7]              |
|                                                       | 4.00                  | 138.5                     |                  |
|                                                       | 5.00                  | 120.2                     |                  |
| GTN-OD                                                | 2.50                  | 104.3                     | [8]              |
|                                                       | 5.00                  | 89.0                      |                  |
| S-am-TiO <sub>2-x</sub> /S-MXene                      | 5.00                  | 167.7                     | [9]              |
|                                                       | 10.00                 | 153.2                     |                  |
| TiO <sub>2</sub> /C-HPD                               | 5.00                  | 110.3                     | [10]             |
|                                                       | 10.00                 | 92.4                      |                  |
| am-TiO <sub>2</sub> -CNT                              | <b>5.00</b>           | <b>179.3</b>              | <b>This work</b> |
|                                                       | <b>10.00</b>          | <b>169.3</b>              |                  |
|                                                       | <b>15.00</b>          | <b>166.7</b>              |                  |

**Table 2** Cycling performance comparison between am-TiO<sub>2</sub>-CNT and reported TiO<sub>2</sub>-based anode materials for SIBs.

| Electrode materials                        | Current density (A/g) | Cycling number | Specific capacity (mAh/g) | Ref.             |
|--------------------------------------------|-----------------------|----------------|---------------------------|------------------|
| S-am-TiO <sub>2-x</sub> /S-MXene           | 10.00                 | 10000          | 121.0                     | [9]              |
| TiO <sub>2</sub> /C-HPD                    | 10.00                 | 10000          | 84.1                      | [10]             |
| TiO <sub>2</sub> @TiO <sub>2-x</sub> -P    | 10.00                 | 5000           | 168.0                     | [11]             |
| NS-TiO <sub>2</sub>                        | 3.35                  | 2400           | 157.4                     | [12]             |
| TiO <sub>2</sub> /SCNT                     | 3.35                  | 1000           | 118.0                     | [13]             |
| TiO <sub>2</sub> -HS                       | 5.00                  | 4000           | 119.0                     | [14]             |
| P-TiO <sub>2</sub>                         | 3.35                  | 1000           | 141.0                     | [15]             |
| a-TiO <sub>2-x</sub> /r-TiO <sub>2-x</sub> | 3.35                  | 4500           | 134.0                     | [16]             |
| TiO <sub>2</sub> -TiOF <sub>2</sub>        | 0.50                  | 2000           | 151.7                     | [17]             |
| <b>am-TiO<sub>2</sub>-CNT</b>              | <b>5.00</b>           | <b>6000</b>    | <b>159.0</b>              | <b>This work</b> |
|                                            | <b>10.00</b>          | <b>6000</b>    | <b>133.2</b>              |                  |

## Reference

- 1.X. Lyu, G. Wu, Z. Zheng, S. Xia, J. Xie, Y. Xia, P. Fan, R. Zhu, Y. Wang, D. Yang, T. Li and A. Dong, *ACS Nano*, 2024, **18**, 2219-2230.
- 2.M. Naguib, M. Kurtoglu, V. Presser, J. Lu, J. Niu, M. Heon, L. Hultman, Y. Gogotsi and M. W. Barsoum, *Advanced Materials*, 2011, **23**, 4248-4253.
- 3.Y. Ling, W. Li, B. Wang, W. Gan, C. Zhu, M. A. Brady and C. Wang, *RSC Advances*, 2016, **6**, 31037-31045.
- 4.D. Lv, D. Wang, N. Wang, H. Liu, S. Zhang, Y. Zhu, K. Song, J. Yang and Y. Qian, *J. Energy Chem.*, 2022, **68**, 104-112.
- 5.C. Wang, N. Cheng, Z. Bai, Q. Gu, F. Niu, X. Xu, J. Zhang, N. Wang, B. Ge, J. Yang, Y. Qian and S. Dou, *J. Energy Chem.*, 2023, **77**, 369-375.
- 6.Q. Cai, X. Li, E. Hu, Z. Wang, P. Lv, J. Zheng, K. Yu, W. Wei and K. K. Ostrikov, *Small*, 2022, **18**, e2200694.
- 7.M. Lee, M. S. Kim, J. M. Oh, J. K. Park and S. M. Paek, *ACS Nano*, 2023, **17**, 3019-3036.
- 8.W. Wang, M. Wu, P. Han, Y. Liu, L. He, Q. Huang, J. Wang, W. Yan, L. Fu and Y. Wu,

- ACS Appl. Mater. & Inter.*, 2018, **11**, 3061-3069.
- 9.C. Lu, X. Li, R. Liu, H. J. Niu, Q. Wang, T. Xiao, J. Liu, H. Wang and W. Zhou, *Adv. Funct. Materi.*, 2023, **33**, 2215228.
- 10.D. Chen, Y. Wu, Z. Huang and J. Chen, *Nano-Micro Letters*, 2022, **14**, 156.
- 11.Q. Gan, H. He, Y. Zhu, Z. Wang, N. Qin, S. Gu, Z. Li, W. Luo and Z. Lu, *ACS Nano*, 2019, **13**, 9247-9258.
12. M. Fan, Z. Lin, P. Zhang, X. Ma, K. Wu, M. Liu and X. Xiong, *Adv. Energy Mater.*, 2020, **11**, 2003037.
- 13.S. Luo, T. Yuan, L. Soule, J. Ruan, Y. Zhao, D. Sun, J. Yang, M. Liu and S. Zheng, *Adv. Funct. Mater.*, 2019, **30**, 1908309.
- 14.X. Xu, B. Chen, J. Hu, B. Sun, X. Liang, N. Li, S. A. Yang, H. Zhang, W. Huang and T. Yu, *Adv. Mater.*, 2019, **31**, 1904589.
- 15.J. Ni, S. Fu, Y. Yuan, L. Ma, Y. Jiang, L. Li and J. Lu, *Adv Mater*, 2018, **30**, 1704337.
- 16.Y. Wu, Y. Jiang, J. Shi, L. Gu and Y. Yu, *Small*, 2017, **13**, 1700129.
- 17.S. Guan, Q. Fan, Z. Shen, Y. Zhao, Y. Sun and Z. Shi, *J. Mater. Chem. A*, 2021, **9**, 5720-5729.
